# Supplementary material for: Molecular imaging of biothiols and in vitro diagnostics based on an organic chromophore bearing a terbium hybrid probe
Source: Royal Society of Chemistry journal article supplement (doi:10.1039/c6dt00156d), 2016-01-01
Supplement: c6dt00156d1.pdf [file c6dt00156d1.pdf]

*Supporting information for*

Molecular imaging of biothiols and in vitro diagnostics based on an  
organic chromophore bearing terbium hybrid probe

**Zhan Zhou,<sup>b</sup> Qianming Wang,<sup>a,b,c\*</sup> Cheng Cheng Zhang<sup>d</sup>, Jinwei Gao<sup>e</sup>**

- a. Key Laboratory of Theoretical Chemistry of Environment, Ministry of Education, School of Chemistry & Environment, South China Normal University, Guangzhou 510006, China*
- b. School of Chemistry & Environment, South China Normal University, Guangzhou 510006, China*
- c. Guangzhou Key Laboratory of Materials for Energy Conversion and Storage Guangzhou 510006, P.R. China*
- d. Departments of Physiology and Developmental Biology, University of Texas, Southwestern Medical Center, Dallas, TX 75390-9133, USA*
- e. Institute for Advanced Materials, Academy of Advanced Optoelectronics, South China Normal University, Guangzhou 510006, P.R. China*

\* To whom the correspondence should be addressed. E-mail: [qmwang@scnu.edu.cn](mailto:qmwang@scnu.edu.cn)

Tel: 86-20-39310258; Fax: 86-20-39310187

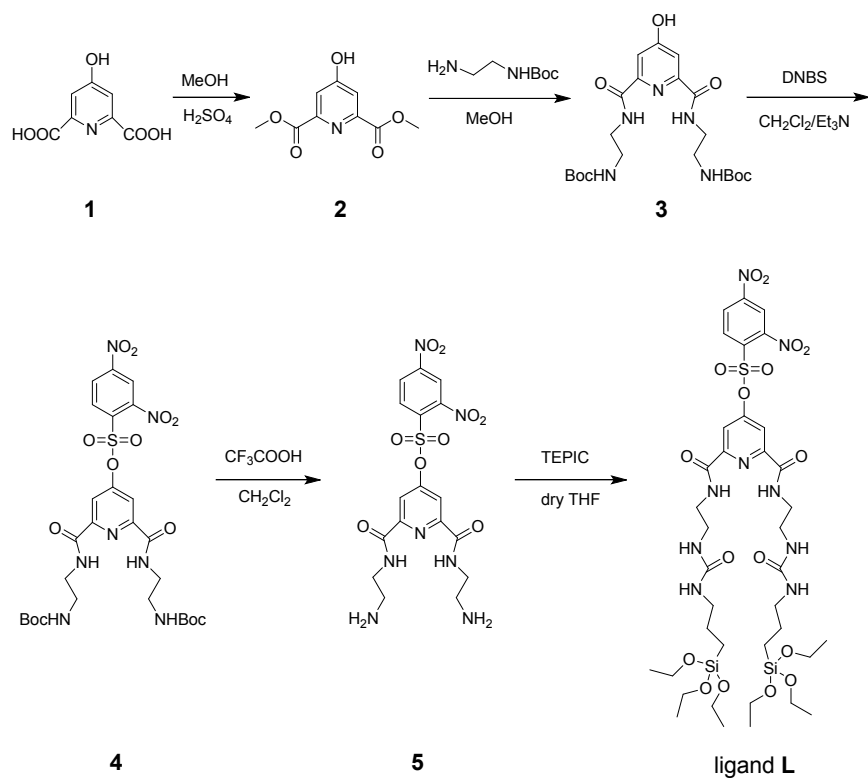

Figure S1 Reaction pathway for the synthesis of ligand L.

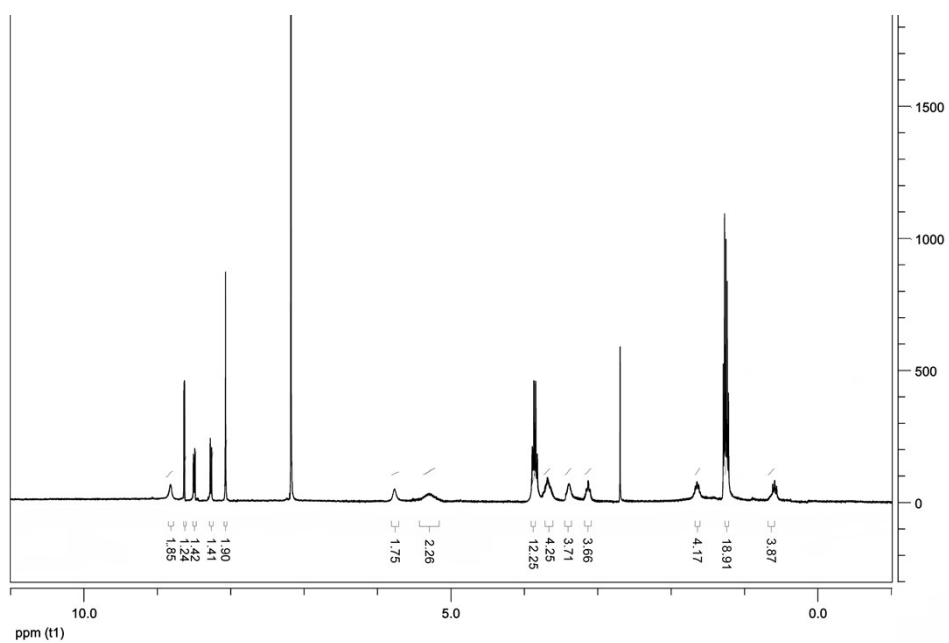

Figure S2  $^1\text{H}$  NMR spectra of ligand L.

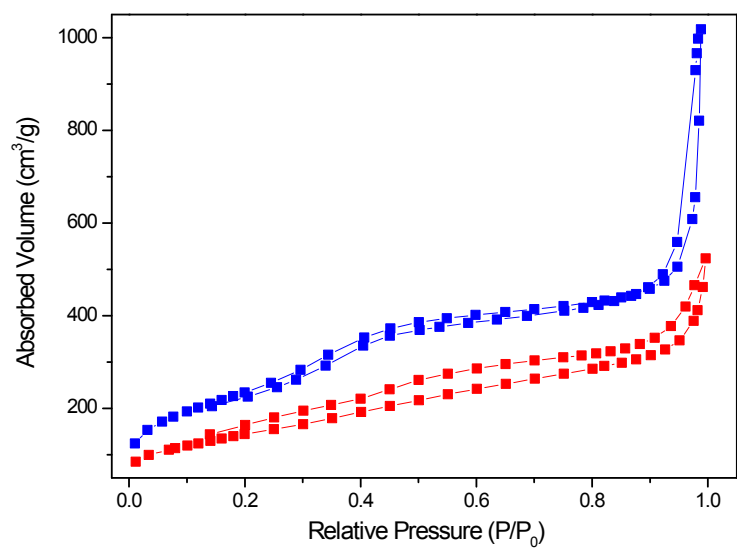

Figure S3 Nitrogen adsorption-desorption curves of MSN in the absence of terbium complex structure (blue) and H-MSN-Tb (red).

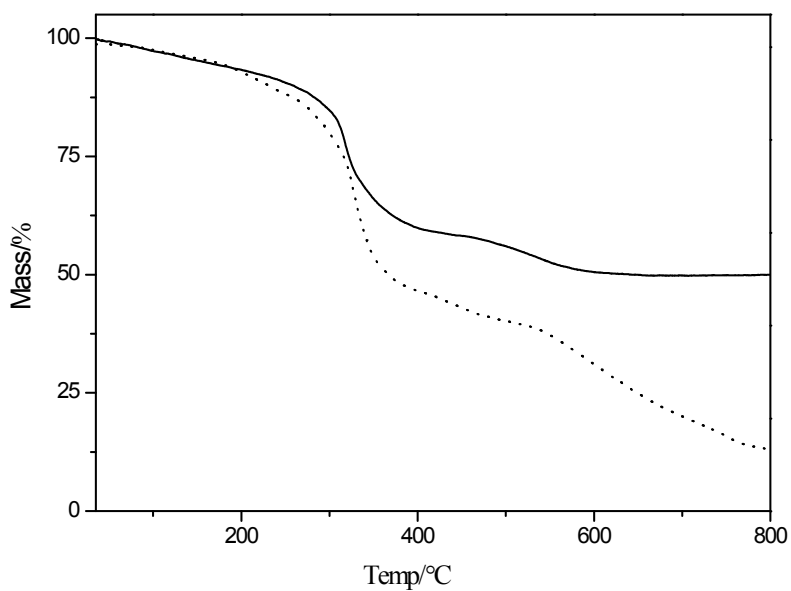

Figure S4 Thermogravimetric analysis traces of Tb-L (dotted line) and H-MSN-Tb (solid line).

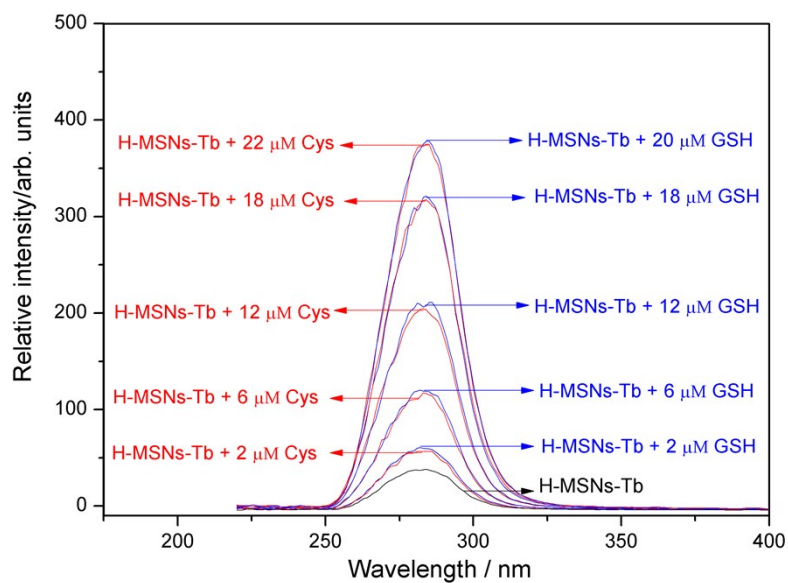

Figure S5 Excitation spectra of 50  $\mu\text{g/mL}$  H-MSNs-Tb without (black line) or with 2, 6, 12, 18, 22  $\mu\text{M}$  Cys (red lines) or 20  $\mu\text{M}$  GSH (blue lines) in water ( $\lambda_{\text{em}} = 545 \text{ nm}$ ).

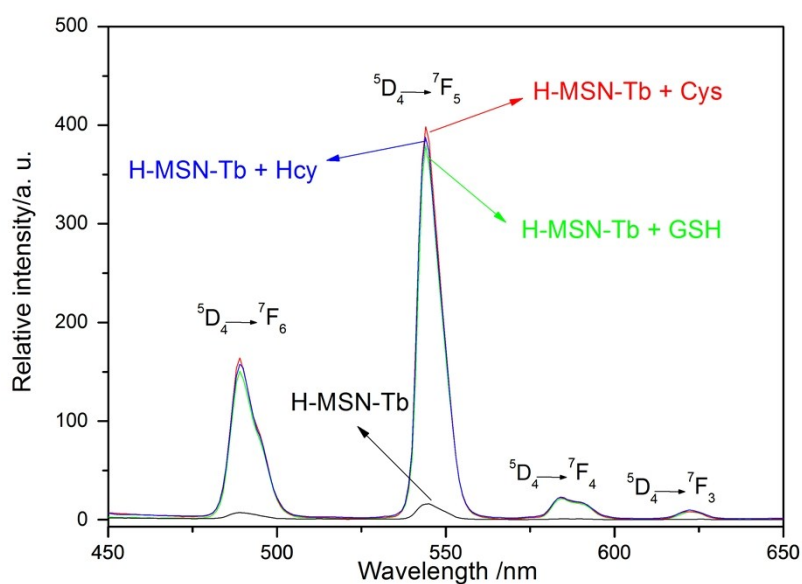

Figure S6 Emission spectra of H-MSN-Tb (50  $\mu\text{g/mL}$ ) in the absence and in the presence of biothiol (20  $\mu\text{M}$ ) in 30 mM HEPES buffer, pH 7.0 ( $\lambda_{\text{ex}} = 284 \text{ nm}$ ).

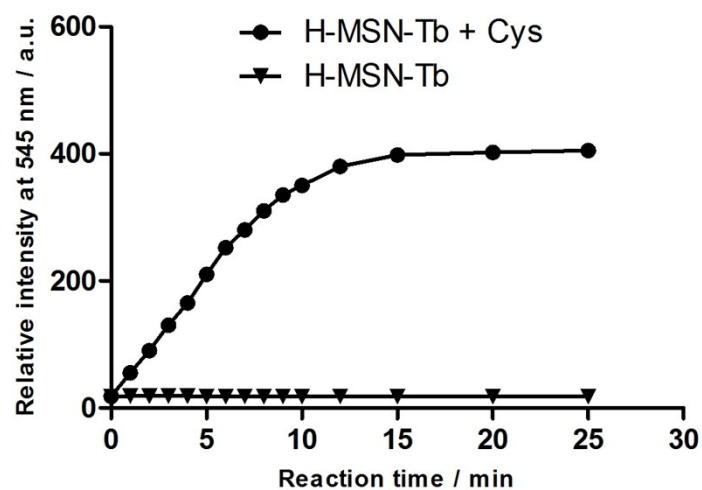

Figure S7 Fluorescence response of H-MSN-Tb (50 µg/mL) as a function of time with or without Cys (20 µM) treatment in 30 mM HEPES buffer, pH 7.0 ( $\lambda_{\text{ex}} = 284 \text{ nm}$ ).

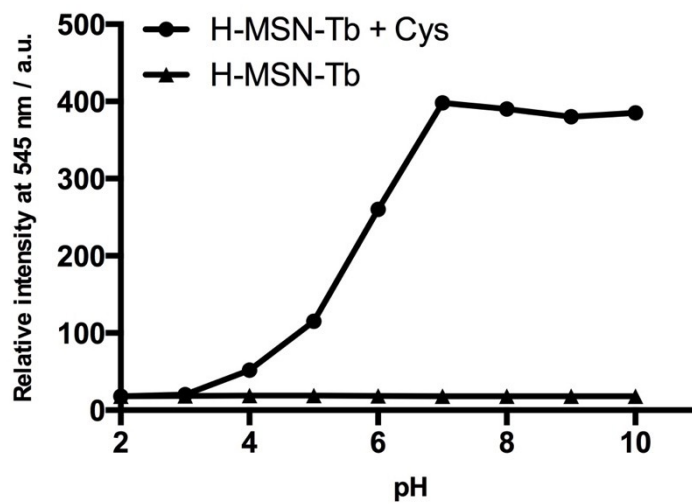

Figure S8 The fluorescence intensity of H-MSN-Tb at 545 nm in the presence and absence of Cys (20 µM) at different pH.

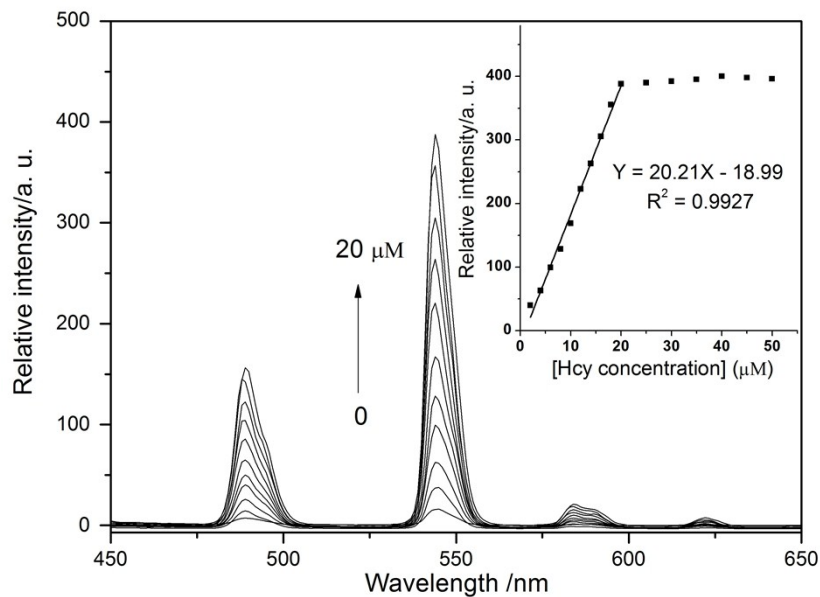

Figure S9 Emission spectra of H-MSN-Tb (50  $\mu\text{g/mL}$ ) upon addition of Hcy (from 0 to 20  $\mu\text{M}$ ) in 30 mM HEPES buffer, pH 7.0 ( $\lambda_{\text{ex}} = 284 \text{ nm}$ ). Inset: Relative intensity of H-MSN-Tb at 545 nm as a function of Hcy concentration from 2 to 20  $\mu\text{M}$ .

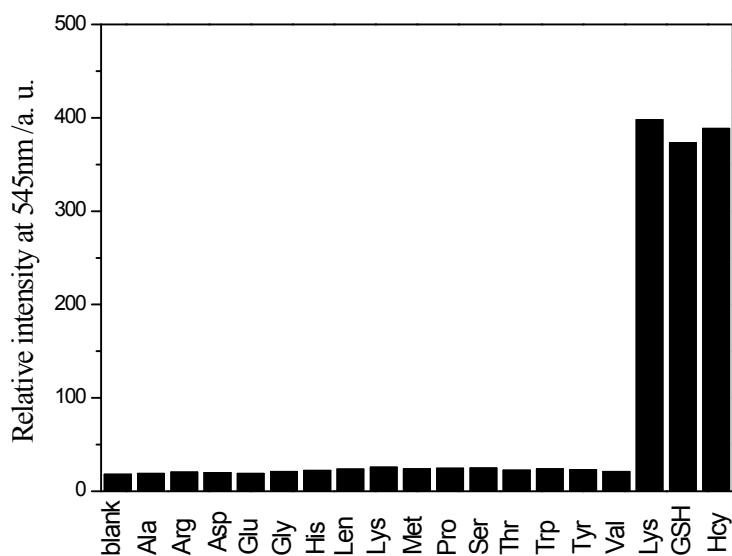

Figure S10 Emission intensities of H-MSNs-Tb at 545 nm in the presence of various amino acids (20  $\mu\text{M}$  for Cys, GSH and Hcy, 100  $\mu\text{M}$  for other amino acids) in 30 mM HEPES buffer, pH 7.

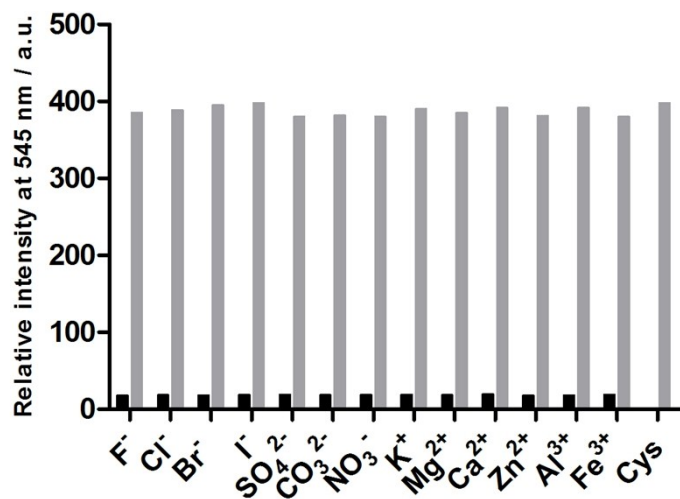

Figure S11 Emission intensities of H-MSNs-Tb at 545 nm to various ions in 30 mM HEPES buffer, pH 7. The black bars represent the fluorescence intensity of H-MSNs-Tb in the presence of miscellaneous ions (20  $\mu$ M). The grey bars represent the fluorescence enhancement upon the subsequent addition of Cys (20  $\mu$ M) to the above solution.

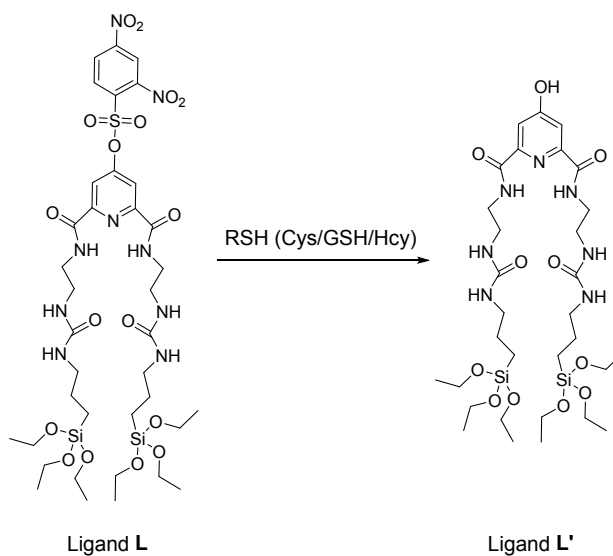

Figure S12 Molecular structures of **L** and **L'**.

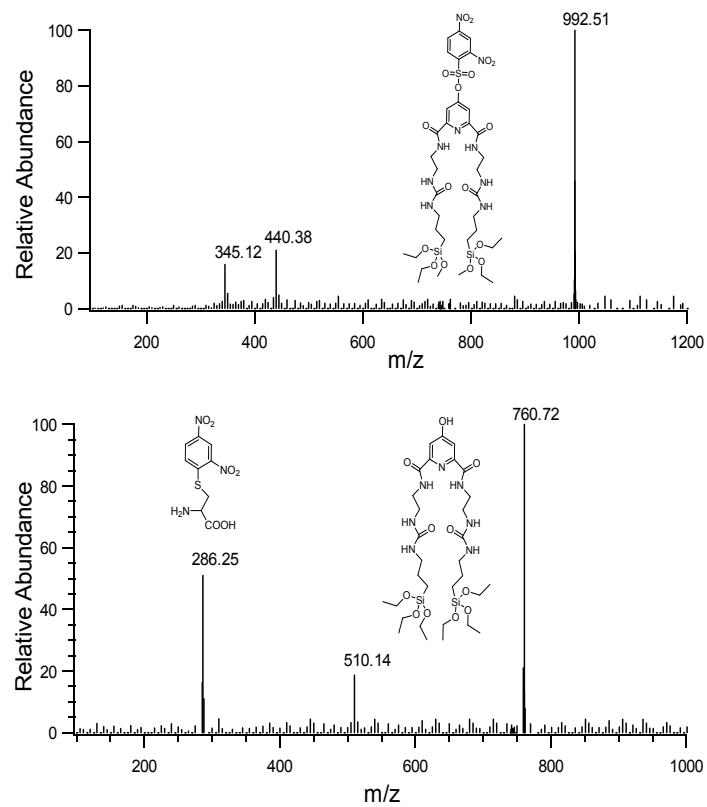

Figure S13 Mass spectra of ligand **L** in the absence (top) and presence of Cys (bottom).
